# Supplementary material for: Selective Si–C(sp3) bond cleavage of a silyl-bridged amido alkyl ligand in an yttrium complex
Source: Royal Society of Chemistry journal article supplement (doi:10.1039/d3dt00149k), 2023-01-01
Supplement: d3dt00149k1.pdf [file d3dt00149k1.pdf]

# Selective Si–C(sp<sup>3</sup>) Bond Cleavage Silyl-Bridged Amido Alkyl Ligand in an Yttrium Complex\*\*

Jiamin Cai,<sup>[a]</sup> Jie Zhang,<sup>\*[a]</sup> and Xigeng Zhou<sup>\*[a]</sup>

---

[a] Department of Chemistry, Shanghai Key Laboratory of Molecular Catalysis and Innovative Materials, Jiangwan Campus, Fudan University, Shanghai 200438, China.

\* E-mail: [zhangjie@fudan.edu.cn](mailto:zhangjie@fudan.edu.cn); [xgzhou@fudan.edu.cn](mailto:xgzhou@fudan.edu.cn)

## Table of Contents

|                                                                                              |    |
|----------------------------------------------------------------------------------------------|----|
| Table of Contents.....                                                                       | 1  |
| 1. X-ray Crystallographic Analysis of All New Complexes .....                                | 2  |
| 2. Molecular structures of complex 6 <sup>H</sup> 、6 <sup>F</sup> and 6 <sup>MeO</sup> ..... | 5  |
| 3. NMR Spectra of All New Compounds .....                                                    | 7  |
| 4. The spectra of in situ <sup>1</sup> H NMR tracking experiments .....                      | 15 |

# 1. X-ray Crystallographic Analysis of All New Complexes

**Table S1.** Crystal data and structure refinement for complexes **2**, **3** and **4**.

|                                                 | <b>2</b>                                                                         | <b>3</b>                                                            | <b>4</b>                                                           |
|-------------------------------------------------|----------------------------------------------------------------------------------|---------------------------------------------------------------------|--------------------------------------------------------------------|
| Empirical formula                               | C <sub>39</sub> H <sub>61</sub> BN <sub>7</sub> O <sub>2</sub> Si <sub>5</sub> Y | C <sub>24</sub> H <sub>46</sub> BN <sub>7</sub> OSSi <sub>2</sub> Y | C <sub>38</sub> H <sub>58</sub> BN <sub>6</sub> OSi <sub>5</sub> Y |
| Formula weight                                  | 844.93                                                                           | 635.63                                                              | 826.91                                                             |
| Temperature/K                                   | 173.01                                                                           | 173.01                                                              | 173                                                                |
| Crystal system                                  | monoclinic                                                                       | monoclinic                                                          | triclinic                                                          |
| Space group                                     | P2 <sub>1</sub> /c                                                               | P21/n                                                               | P-1                                                                |
| a/Å                                             | 17.3751(11)                                                                      | 11.0031(3)                                                          | 9.7167(6)                                                          |
| b/Å                                             | 15.4894(10)                                                                      | 22.2150(8)                                                          | 10.5316(7)                                                         |
| c/Å                                             | 16.8249(10)                                                                      | 14.0346(7)                                                          | 22.2080(13)                                                        |
| α/°                                             | 90                                                                               | 90                                                                  | 87.551(2)                                                          |
| β/°                                             | 93.992(3)                                                                        | 108.192(2)                                                          | 82.318(2)                                                          |
| γ/°                                             | 90                                                                               | 90                                                                  | 84.784(2)                                                          |
| Volume/Å <sup>3</sup>                           | 4517.1(5)                                                                        | 3259.1(2)                                                           | 2241.8(2)                                                          |
| Z                                               | 4                                                                                | 4                                                                   | 2                                                                  |
| ρ <sub>calc</sub> (g/cm <sup>3</sup> )          | 1.241                                                                            | 1.295                                                               | 1.225                                                              |
| μ/mm <sup>-1</sup>                              | 1.916                                                                            | 2.69                                                                | 1.917                                                              |
| F(000)                                          | 1784                                                                             | 1336                                                                | 872                                                                |
| Crystal size/mm <sup>3</sup>                    | 0.86 × 0.13 × 0.02                                                               | 0.13 × 0.09 × 0.05                                                  | 0.29 × 0.15 × 0.05                                                 |
| Radiation                                       | GaKα (λ = 1.34138)                                                               | GaKα (λ = 1.34138)                                                  | GaKα (λ = 1.34138)                                                 |
| 2θ range for data collection/°                  | 6.658 to 114.144                                                                 | 6.726 to 137.468                                                    | 6.992 to 105.99                                                    |
| Index ranges                                    | -21 ≤ h ≤ 21, -19 ≤ k ≤ 19, -20 ≤ l ≤ 21                                         | -15 ≤ h ≤ 15, -30 ≤ k ≤ 30, -19 ≤ l ≤ 18                            | -11 ≤ h ≤ 11, -12 ≤ k ≤ 12, -26 ≤ l ≤ 26                           |
| Reflections collected                           | 67326                                                                            | 60567                                                               | 67949                                                              |
| Independent reflections                         | 9246 [R <sub>int</sub> = 0.0707, R <sub>sigma</sub> = 0.0419]                    | 9130 [R <sub>int</sub> = 0.5056, R <sub>sigma</sub> = 0.1461]       | 7944 [R <sub>int</sub> = 0.0509, R <sub>sigma</sub> = 0.0275]      |
| Data/restraints/parameters                      | 9246/21/497                                                                      | 9130/0/346                                                          | 7944/0/507                                                         |
| Goodness-of-fit on F <sup>2</sup>               | 1.103                                                                            | 1.064                                                               | 1.229                                                              |
| Final R indexes [I >= 2σ(I)]                    | R <sub>1</sub> = 0.0355, wR <sub>2</sub> = 0.0886                                | R <sub>1</sub> = 0.0854, wR <sub>2</sub> = 0.1976                   | R <sub>1</sub> = 0.0386, wR <sub>2</sub> = 0.1118                  |
| Final R indexes [all data]                      | R <sub>1</sub> = 0.0431, wR <sub>2</sub> = 0.0979                                | R <sub>1</sub> = 0.0955, wR <sub>2</sub> = 0.2134                   | R <sub>1</sub> = 0.0422, wR <sub>2</sub> = 0.1253                  |
| Largest diff. peak and hole / e. Å <sup>3</sup> | 0.76/-0.43                                                                       | 1.73/-2.71                                                          | 0.67/-0.76                                                         |

**Table S1.** Crystal data and structure refinement for complexes **5**, **6<sup>H</sup>** and **6<sup>MeO</sup>**.

|                                                 | <b>5</b>                                                           | <b>6<sup>H</sup></b>                                               | <b>6<sup>MeO</sup></b>                                                           |
|-------------------------------------------------|--------------------------------------------------------------------|--------------------------------------------------------------------|----------------------------------------------------------------------------------|
| Empirical formula                               | C <sub>48</sub> H <sub>60</sub> BN <sub>10</sub> Si <sub>3</sub> Y | C <sub>39</sub> H <sub>60</sub> BN <sub>8</sub> OSi <sub>3</sub> Y | C <sub>40</sub> H <sub>62</sub> BN <sub>8</sub> O <sub>2</sub> Si <sub>3</sub> Y |
| Formula weight                                  | 961.05                                                             | 840.94                                                             | 870.96                                                                           |
| Temperature/K                                   | 172.99                                                             | 172.99                                                             | 173                                                                              |
| Crystal system                                  | triclinic                                                          | triclinic                                                          | triclinic                                                                        |
| Space group                                     | P-1                                                                | P-1                                                                | P-1                                                                              |
| a/Å                                             | 10.2029(4)                                                         | 9.8288(6)                                                          | 9.7543(3)                                                                        |
| b/Å                                             | 10.7900(4)                                                         | 10.6314(6)                                                         | 10.6068(3)                                                                       |
| c/Å                                             | 23.0484(7)                                                         | 21.1115(12)                                                        | 22.0190(7)                                                                       |
| α/°                                             | 91.3010(10)                                                        | 100.208(2)                                                         | 98.8250(10)                                                                      |
| β/°                                             | 97.5760(10)                                                        | 90.122(2)                                                          | 92.4230(10)                                                                      |
| γ/°                                             | 95.7210(10)                                                        | 95.118(2)                                                          | 96.4810(10)                                                                      |
| Volume/Å <sup>3</sup>                           | 2501.05(16)                                                        | 2162.1(2)                                                          | 2232.65(12)                                                                      |
| Z                                               | 2                                                                  | 2                                                                  | 2                                                                                |
| ρ <sub>calc</sub> (g/cm <sup>3</sup> )          | 1.276                                                              | 1.292                                                              | 1.296                                                                            |
| μ/mm <sup>-1</sup>                              | 1.766                                                              | 1.993                                                              | 1.953                                                                            |
| F(000)                                          | 1008                                                               | 888                                                                | 920                                                                              |
| Crystal size/mm <sup>3</sup>                    | 0.08 × 0.07 × 0.04                                                 | 0.18 × 0.07 × 0.06                                                 | 0.22 × 0.12 × 0.07                                                               |
| Radiation                                       | GaKα (λ = 1.34138)                                                 | GaKα (λ = 1.34138)                                                 | GaKα (λ = 1.34138)                                                               |
| 2θ range for data collection/°                  | 7.168 to 89.882                                                    | 7.382 to 112.734                                                   | 7.672 to 102.748                                                                 |
| Index ranges                                    | -10 ≤ h ≤ 10, -11 ≤ k ≤ 11, -24 ≤ l ≤ 24                           | -12 ≤ h ≤ 12, -13 ≤ k ≤ 13, -26 ≤ l ≤ 25                           | -11 ≤ h ≤ 11, -12 ≤ k ≤ 12, -25 ≤ l ≤ 25                                         |
| Reflections collected                           | 20829                                                              | 30186                                                              | 27407                                                                            |
| Independent reflections                         | 6118 [R <sub>int</sub> = 0.0702, R <sub>sigma</sub> = 0.0691]      | 8489 [R <sub>int</sub> = 0.0593, R <sub>sigma</sub> = 0.0540]      | 7355 [R <sub>int</sub> = 0.0692, R <sub>sigma</sub> = 0.0613]                    |
| Data/restraints/parameters                      | 6118/0/586                                                         | 8489/0/496                                                         | 7355/0/514                                                                       |
| Goodness-of-fit on F <sup>2</sup>               | 1.022                                                              | 1.087                                                              | 1.08                                                                             |
| Final R indexes [I >= 2σ (I)]                   | R <sub>1</sub> = 0.0407, wR <sub>2</sub> = 0.0824                  | R <sub>1</sub> = 0.0570, wR <sub>2</sub> = 0.1785                  | R <sub>1</sub> = 0.0499, wR <sub>2</sub> = 0.1362                                |
| Final R indexes [all data]                      | R <sub>1</sub> = 0.0623, wR <sub>2</sub> = 0.0913                  | R <sub>1</sub> = 0.0632, wR <sub>2</sub> = 0.1852                  | R <sub>1</sub> = 0.0579, wR <sub>2</sub> = 0.1429                                |
| Largest diff. peak and hole / e. Å <sup>3</sup> | 0.35/-0.52                                                         | 2.32/-1.38                                                         | 1.29/-0.88                                                                       |

**Table S3.** Crystal data and structure refinement for complexes **6<sup>F</sup>** and **7**.

| <b>6<sup>F</sup></b>                            |                                                                     |
|-------------------------------------------------|---------------------------------------------------------------------|
| Empirical formula                               | C <sub>39</sub> H <sub>59</sub> BFN <sub>8</sub> OSi <sub>3</sub> Y |
| Formula weight                                  | 858.93                                                              |
| Temperature/K                                   | 173                                                                 |
| Crystal system                                  | triclinic                                                           |
| Space group                                     | P-1                                                                 |
| a/Å                                             | 9.7140(3)                                                           |
| b/Å                                             | 10.5154(3)                                                          |
| c/Å                                             | 21.8740(7)                                                          |
| α/°                                             | 98.5180(10)                                                         |
| β/°                                             | 93.9370(10)                                                         |
| γ/°                                             | 94.1280(10)                                                         |
| Volume/Å <sup>3</sup>                           | 2196.84(12)                                                         |
| Z                                               | 2                                                                   |
| ρ <sub>calc</sub> (g/cm <sup>3</sup> )          | 1.298                                                               |
| μ/mm <sup>-1</sup>                              | 1.991                                                               |
| F(000)                                          | 904                                                                 |
| Crystal size/mm <sup>3</sup>                    | 0.22 × 0.14 × 0.12                                                  |
| Radiation                                       | GaKα (λ = 1.34138)                                                  |
| 2θ range for data collection/°                  | 7.724 to 100.878                                                    |
| Index ranges                                    | -11 ≤ h ≤ 11, -12 ≤ k ≤ 12, -25 ≤ l ≤ 25                            |
| Reflections collected                           | 21343                                                               |
| Independent reflections                         | 6956 [R <sub>int</sub> = 0.0427, R <sub>sigma</sub> = 0.0403]       |
| Data/restraints/parameters                      | 6956/0/499                                                          |
| Goodness-of-fit on F <sup>2</sup>               | 1.039                                                               |
| Final R indexes [I > 2σ (I)]                    | R <sub>1</sub> = 0.0379, wR <sub>2</sub> = 0.1040                   |
| Final R indexes [all data]                      | R <sub>1</sub> = 0.0393, wR <sub>2</sub> = 0.1053                   |
| Largest diff. peak and hole / e. Å <sup>3</sup> | 1.65/-0.58                                                          |

## 2. Molecular structures of complex $6^H$ 、 $6^F$ and $6^{MeO}$

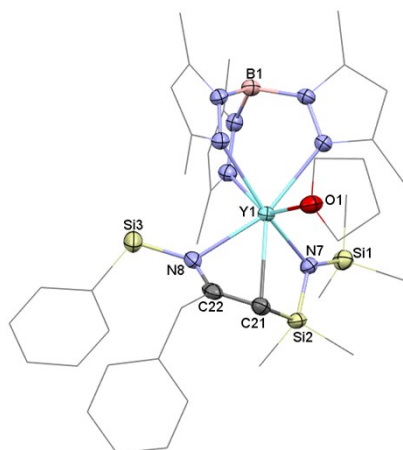

**Figure S1 (  $6^H$  )**

Molecular structure of  $6^H$ . Thermal ellipsoids are set at 50% probability level. H atoms are not shown for clarity. Selected bond lengths [Å] and angles [°] : Y1-N8 2.340(3), Y1-N7 2.261(3), N8-C22 1.367(5), C21-C22 1.369(6), C22-C23 1.531(6), Si2-C21 1.872(4), Si2-N7 1.707(3), Si1-N7 1.713(3), Si3-N8 1.704(4); N8-Y1-N7 99.03(8), N8-C22-C21 119.9(3), C22-C21-Si2 128.4(3), C21-Si2-N7 107.77(16), Y1-N7-Si2 99.24(14).

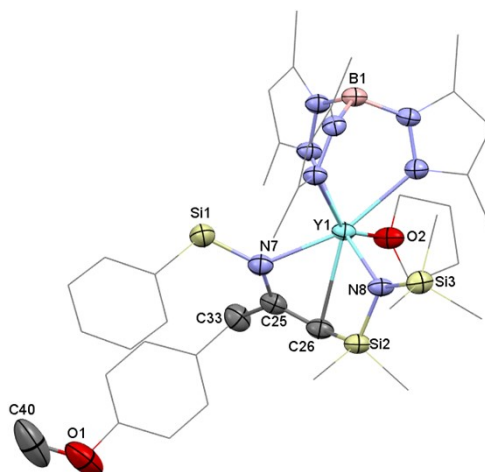

**Figure S2 (  $6^{MeO}$  )**

Molecular structure of  $6^{MeO}$ . Thermal ellipsoids are set at 50% probability level. H atoms are not shown for clarity. Selected bond lengths [Å] and angles [°] : Y1-N7 2.326(3), N7-C25 1.362(4), C26-C25 1.373(5), Si2-C26 1.869(3), Si2-N8 1.707(3), Si1-N7 1.708(3), Si3-N8 1.708(3), C25-C33 1.536(5); N8-Y1-N7 98.80(10), C25-N7-Y1 92.9(2), C25-C26-Si2 129.1(3), N8-Si2-C26 108.26(14), Si2-N8-Y1 99.39(12).

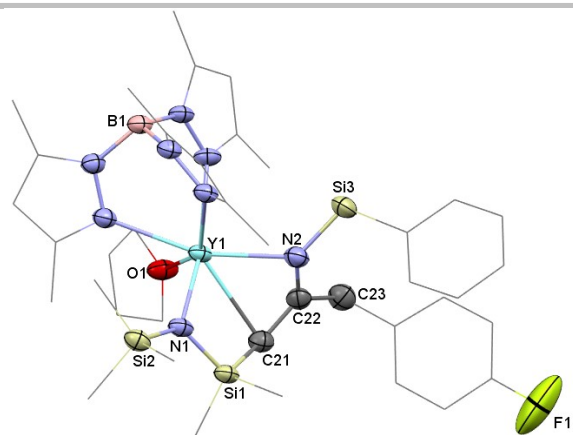

**Figure S3 ( 6<sup>f</sup> )**

Molecular structure of **6<sup>f</sup>**. Thermal ellipsoids are set at 50% probability level. H atoms are not shown for clarity. Selected bond lengths [Å] and angles [°] : Y1-N1 2.263(2), Y1-N2 2.331(2), N1-Si1 1.706(2), N1-Si2 1.711(2), C21-Si1 1.876(3), C21-C22 1.375(4), C22-C23 1.529(4), N2-C22 1.367(4), N2-Si3 1.705(2); N1-Y1-N2 99.02(8), N1-Si1-C21 108.18(12), C22-C21-Si1 128.9(2), C21-C22 C23 118.8(3), N2-C22-C21 120.5(3), N2-C22-C23 120.6(3), C22-N2-Y1 92.33(16).

### 3. NMR Spectra of All New Compounds

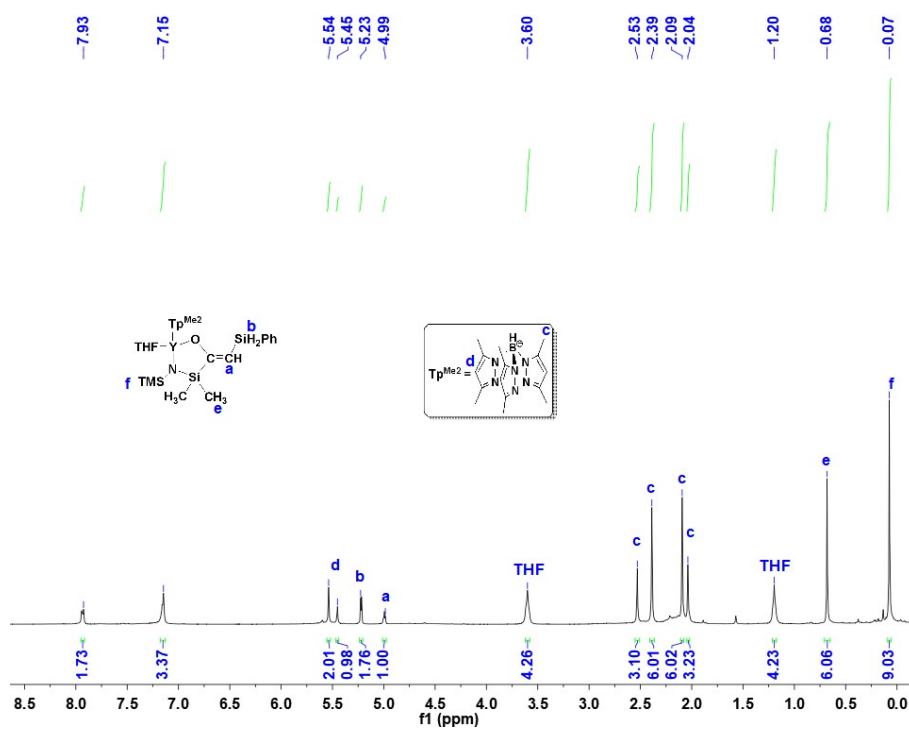

Figure S4. <sup>1</sup>H NMR spectrum of complex **2** in C<sub>6</sub>D<sub>6</sub> at room temperature.

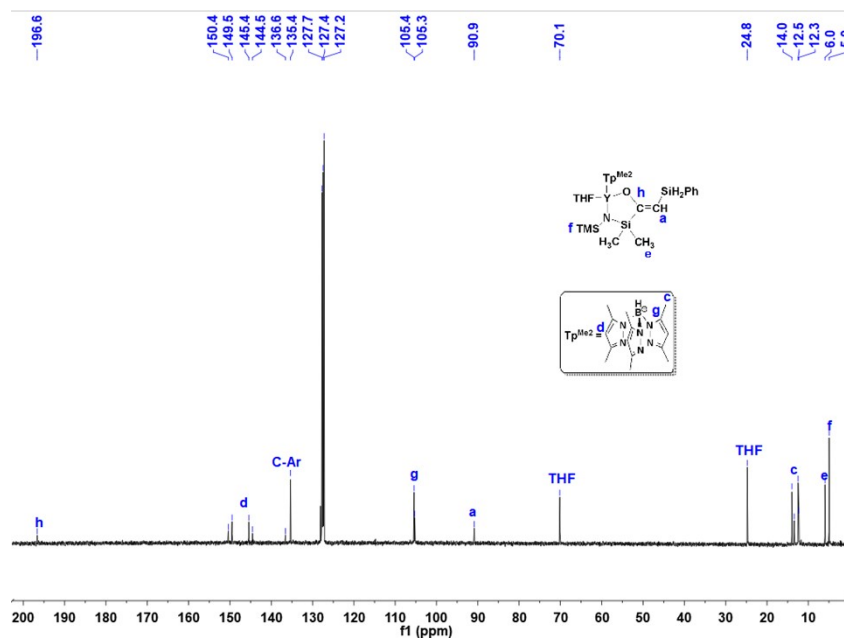

Figure S5. <sup>13</sup>C{<sup>1</sup>H} NMR spectrum of complex **2** in C<sub>6</sub>D<sub>6</sub> at room temperature.

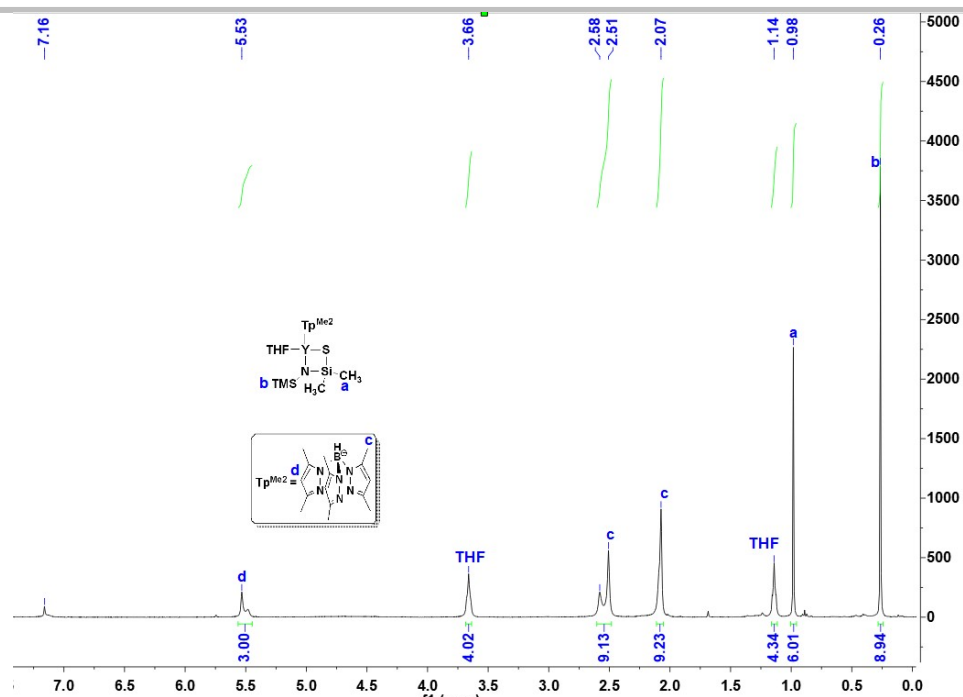

Figure S6.  $^1\text{H}$  NMR spectrum of complex **3** in  $\text{C}_6\text{D}_6$  at room temperature.

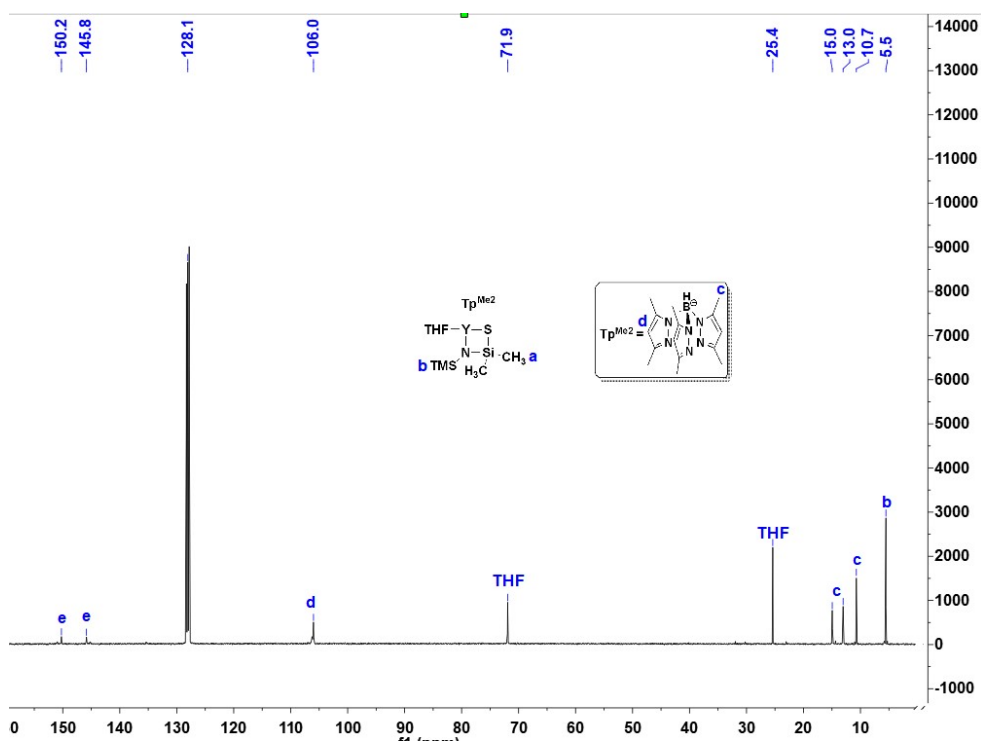

Figure S7.  $^{13}\text{C}\{^1\text{H}\}$  NMR spectrum of complex **3** in  $\text{C}_6\text{D}_6$  at room temperature.



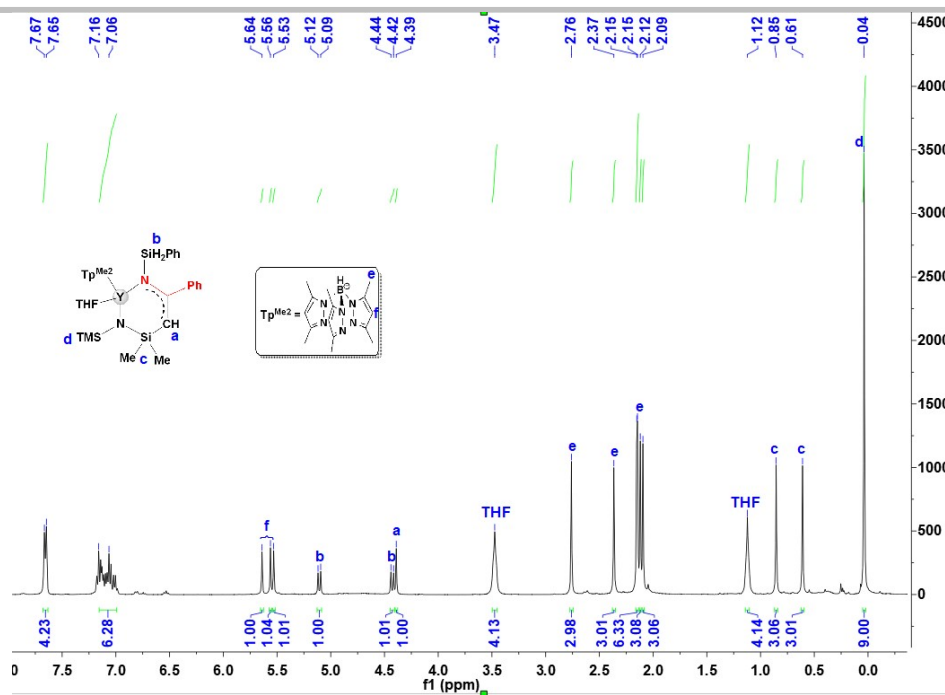

Figure S8.  $^1\text{H}$  NMR spectrum of complex 4 in  $\text{C}_6\text{D}_6$  at room temperature.

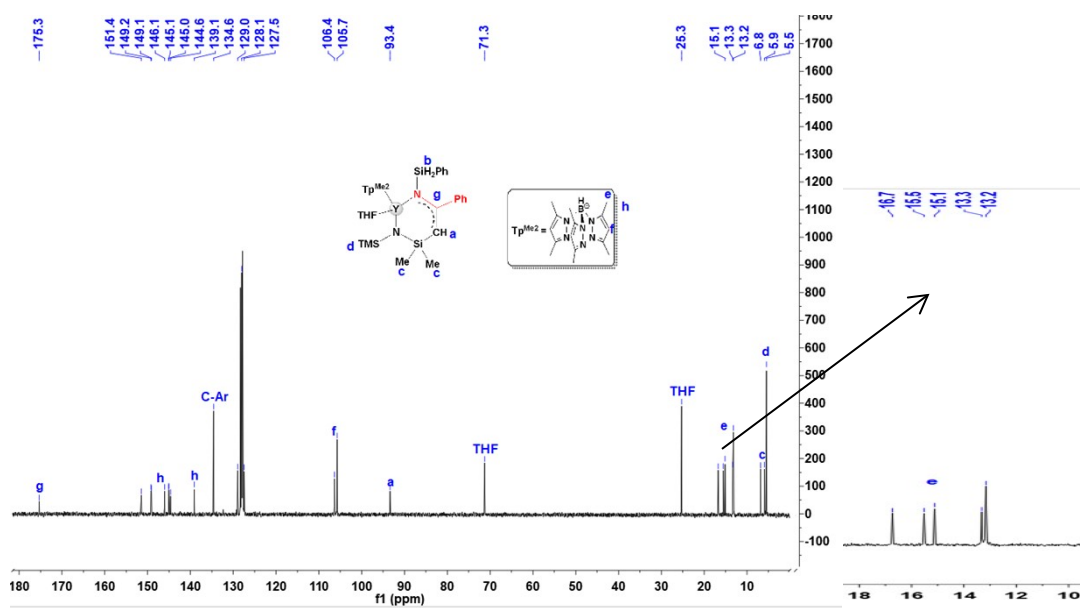

Figure S9.  $^{13}\text{C}\{^1\text{H}\}$  NMR spectrum of complex 4 in  $\text{C}_6\text{D}_6$  at room temperature.

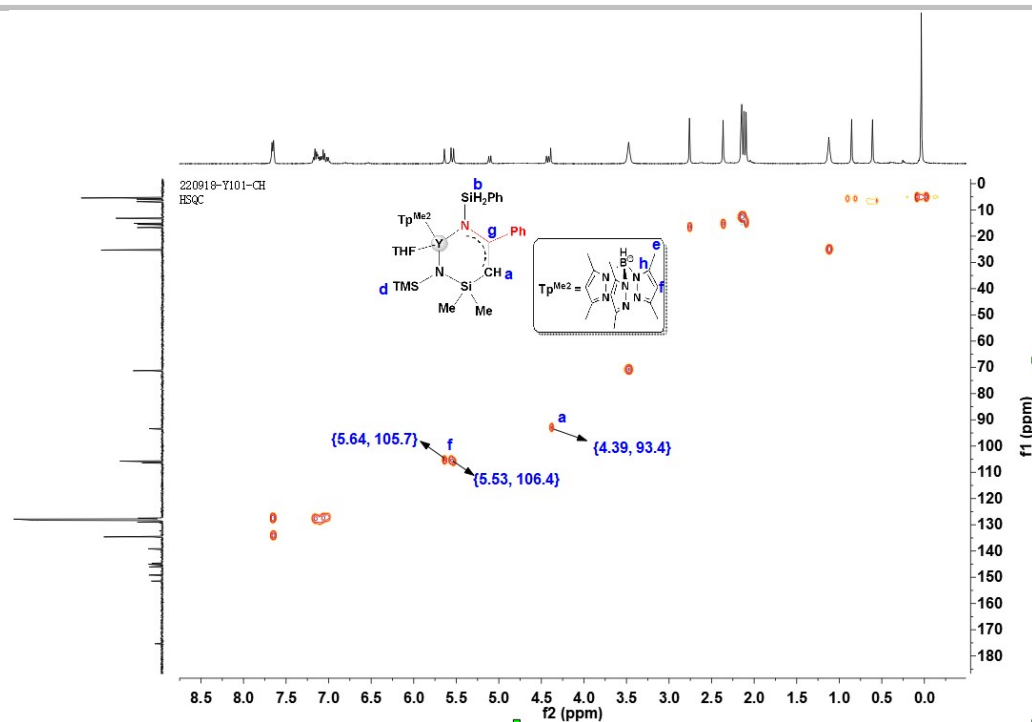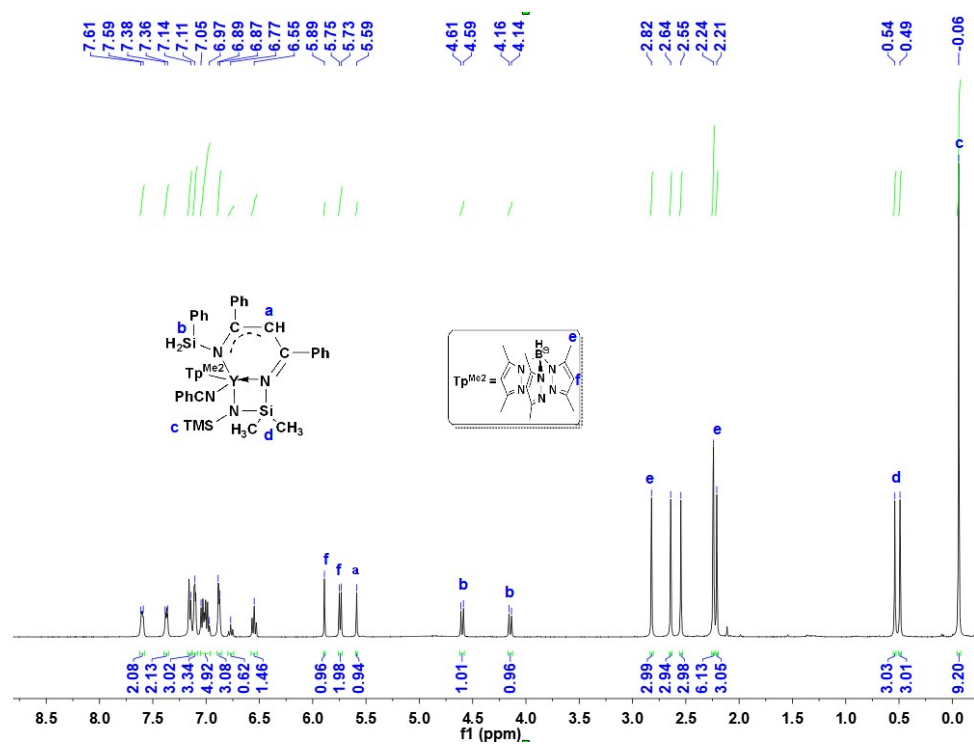

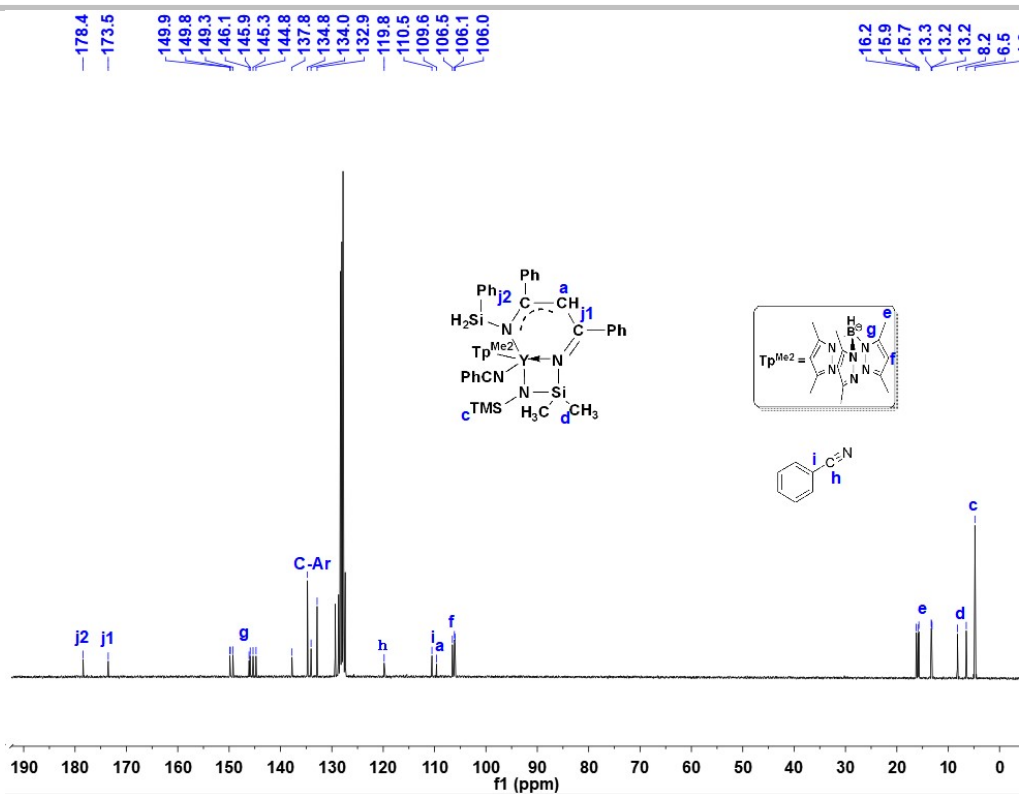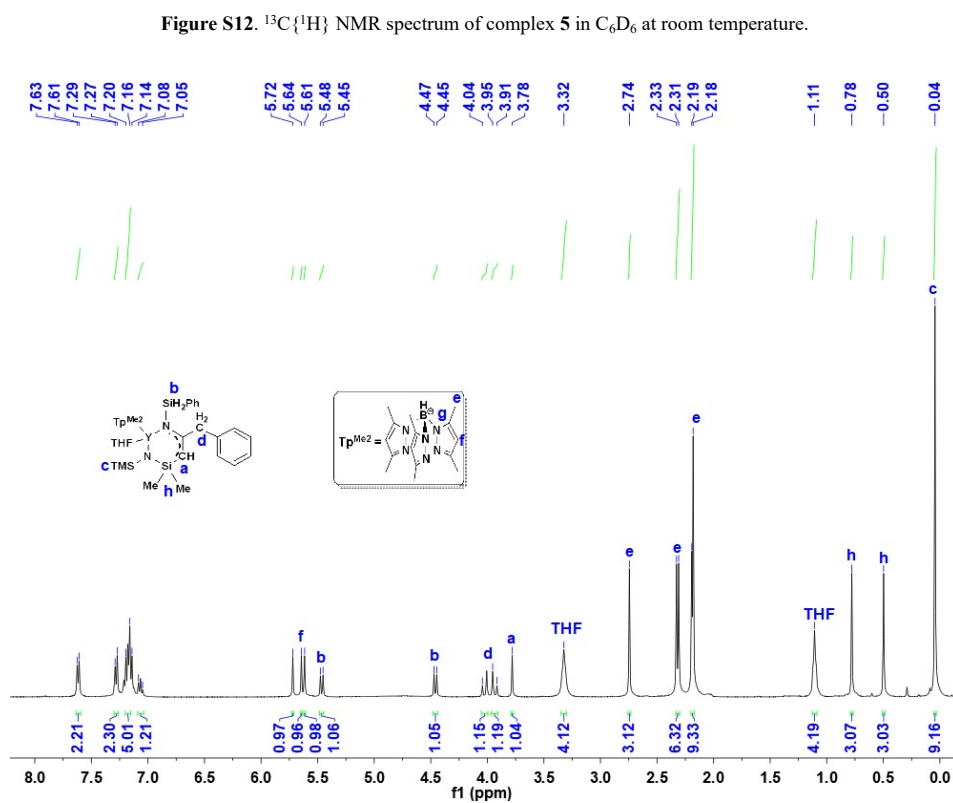

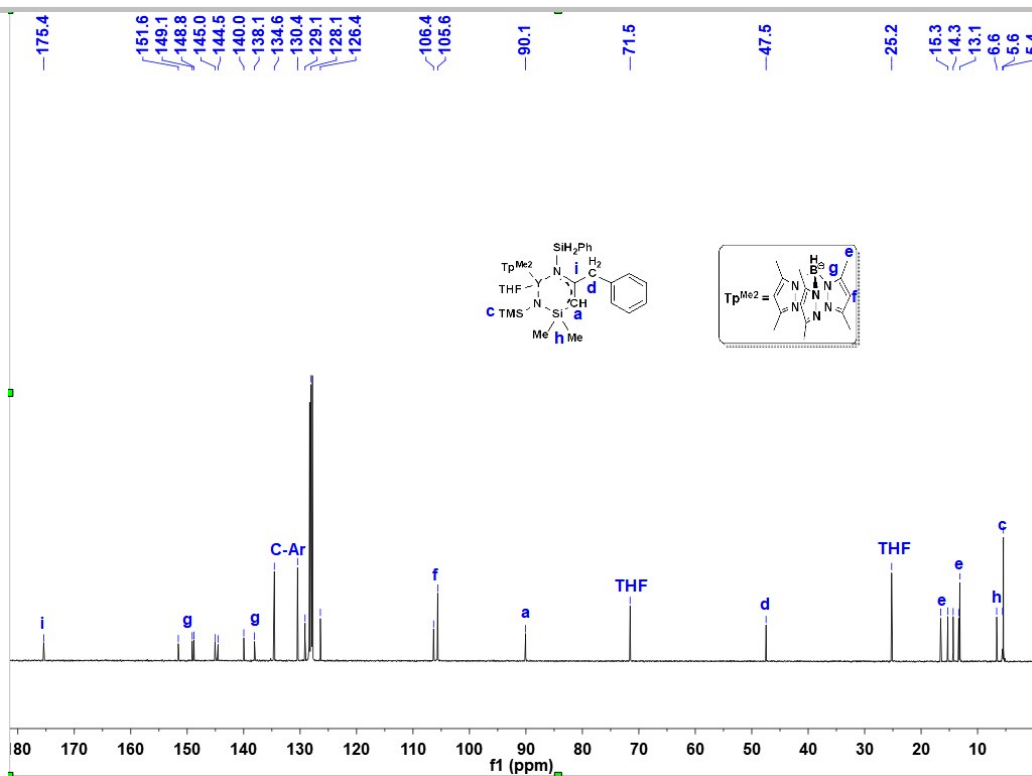

Figure S14.  $^{13}\text{C}\{^1\text{H}\}$  NMR spectrum of complex  $6^{\text{H}}$  in  $\text{C}_6\text{D}_6$  at room temperature.

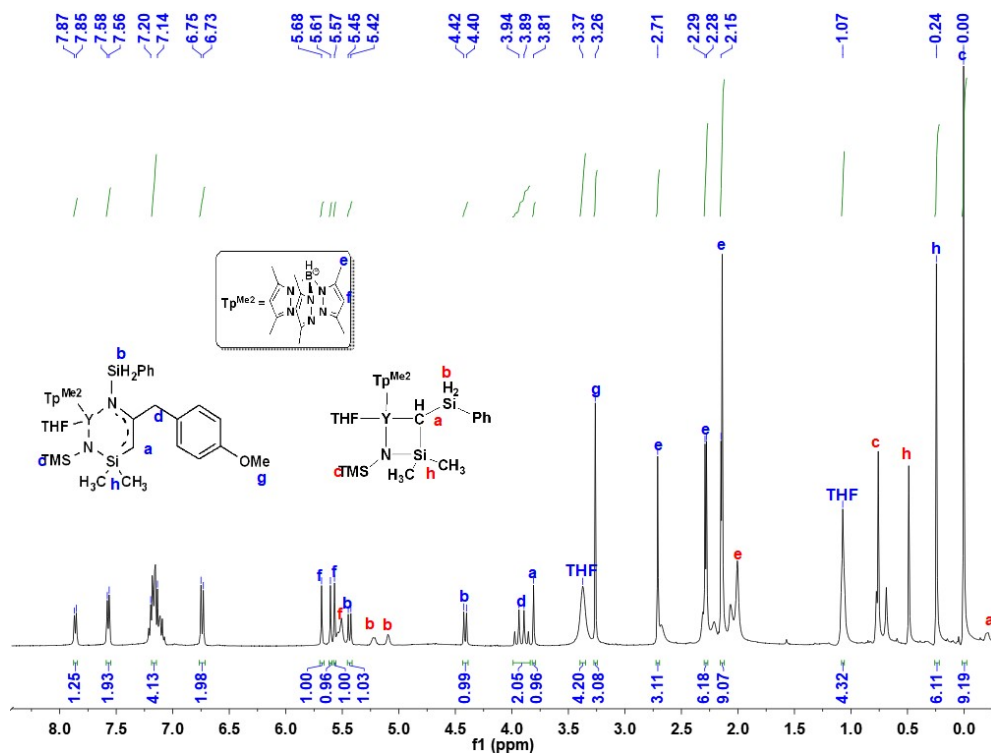

Figure S15.  $^1\text{H}$  NMR spectrum of complex  $6^{\text{MeO}}$  in  $\text{C}_6\text{D}_6$  at room temperature.

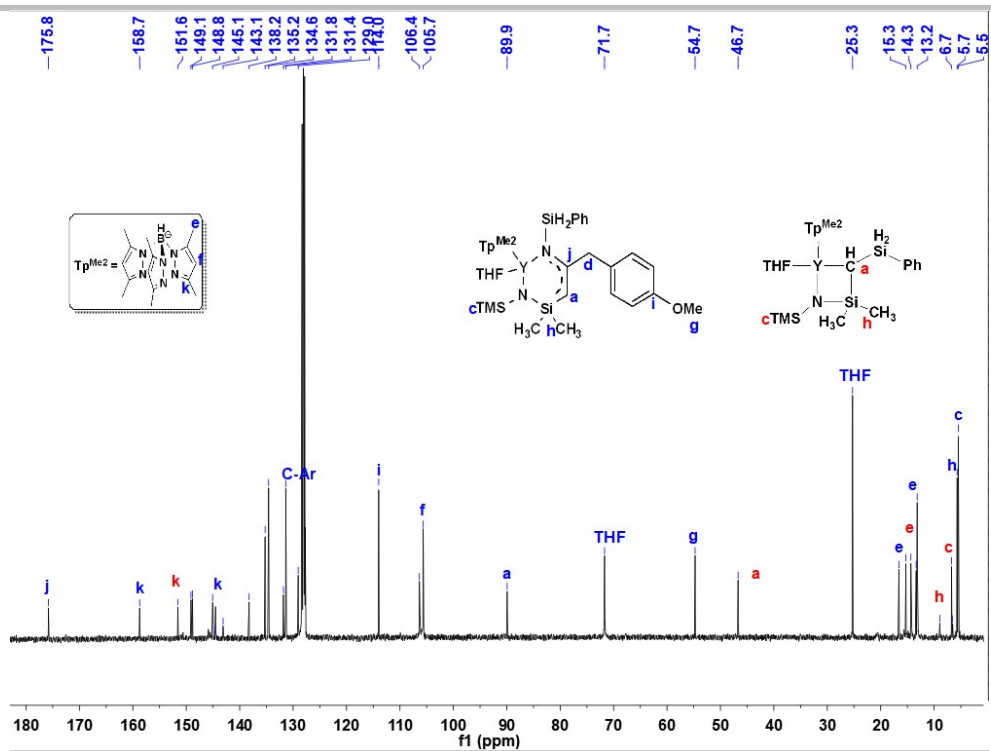

Figure S16.  $^{13}\text{C}\{^1\text{H}\}$  NMR spectrum of complex  $6^{\text{MeO}}$  in  $\text{C}_6\text{D}_6$  at room temperature.

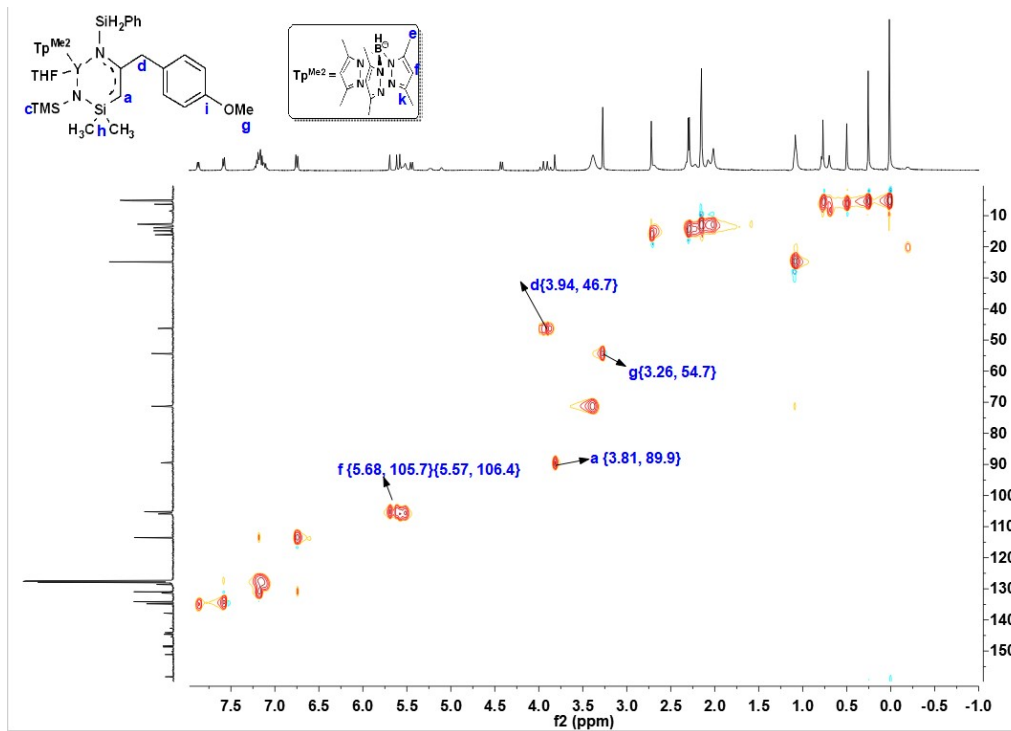

Figure S17. HSQC ( $^1\text{H}$  NMR -  $^{13}\text{C}$  NMR) Spectrum of  $6^{\text{MeO}}$  in  $\text{C}_6\text{D}_6$  at room temperature.

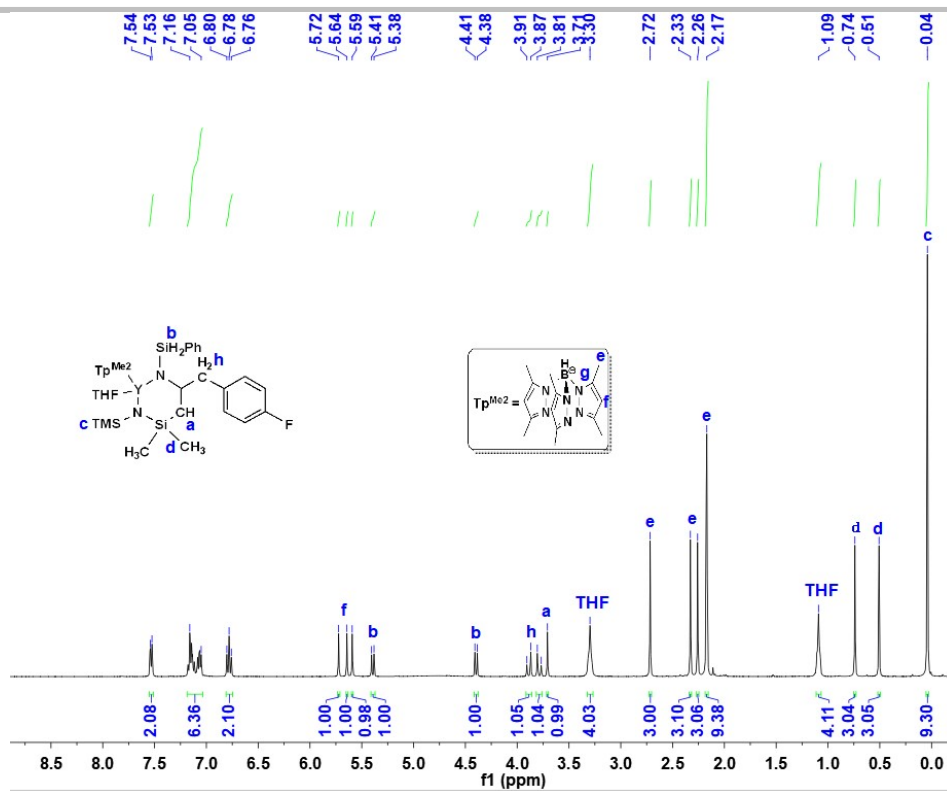

Figure S18. <sup>1</sup>H NMR spectrum of complex 6<sup>F</sup> in C<sub>6</sub>D<sub>6</sub> at room temperature.

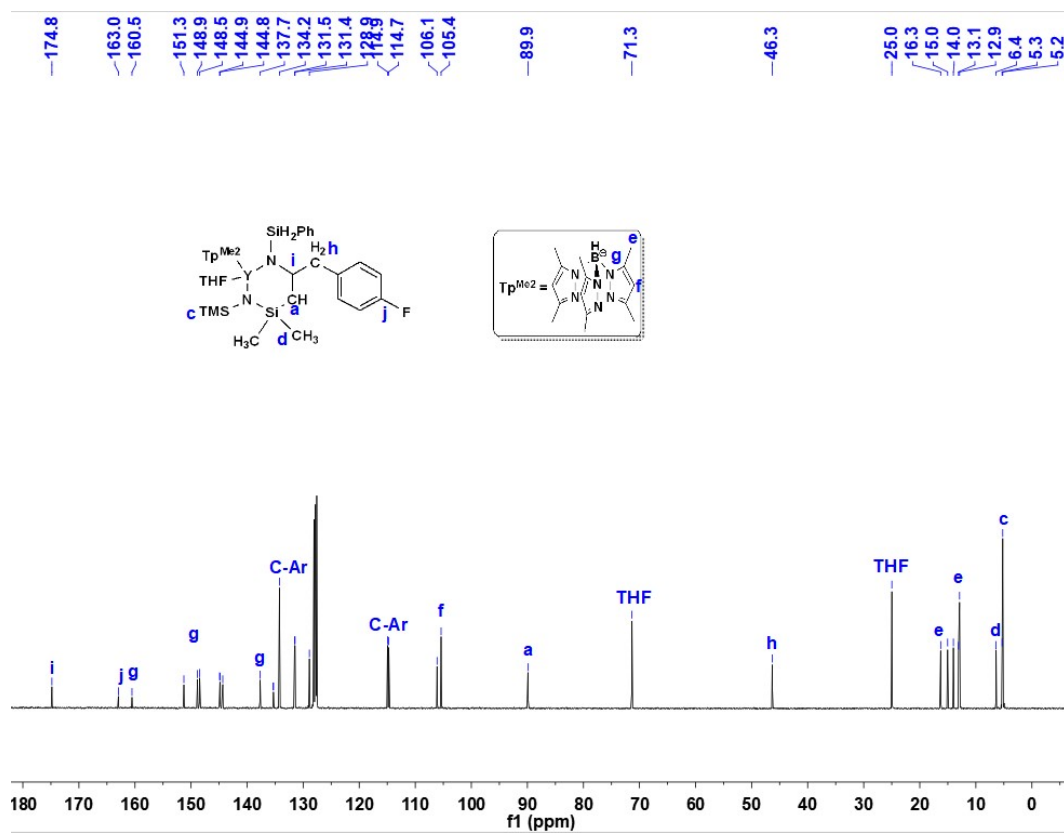

Figure S19. <sup>13</sup>C{<sup>1</sup>H} NMR spectrum of complex 6<sup>F</sup> in C<sub>6</sub>D<sub>6</sub> at room temperature.

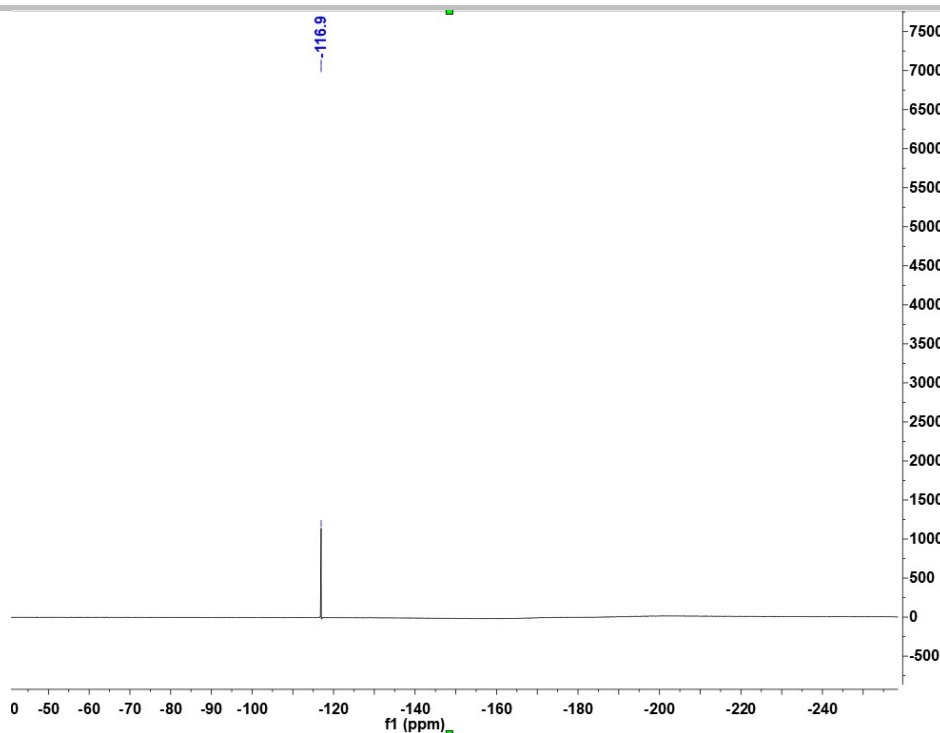

Figure S20.  $^{19}\text{F}$  NMR spectrum of complex  $6^{\text{F}}$  in  $\text{C}_6\text{D}_6$  at room temperature.

#### 4. The spectra of in situ $^1\text{H}$ NMR tracking experiments

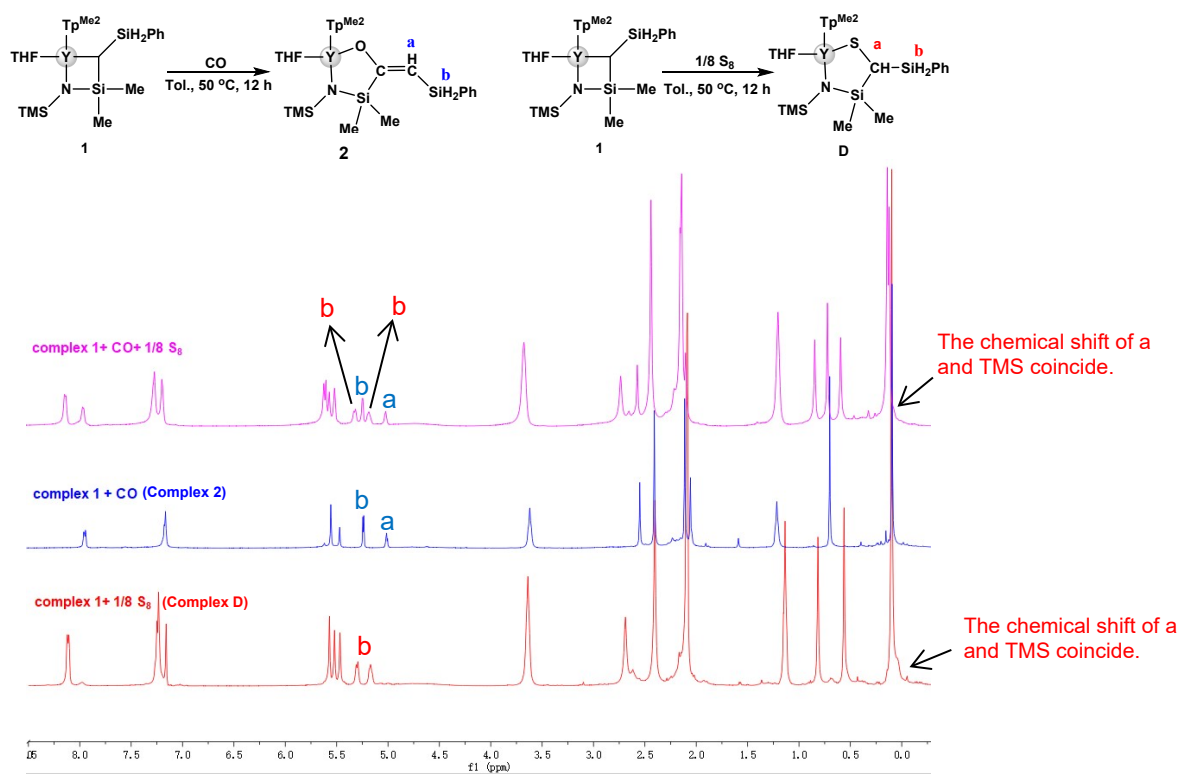

Figure S21. The in situ  $^1\text{H}$  NMR spectra of the reaction of **1**, CO, and  $1/8 \text{S}_8$  in  $\text{C}_6\text{D}_6$  (Attempt to obtain the crystal structure was unsuccessful due to poor crystalline sample).

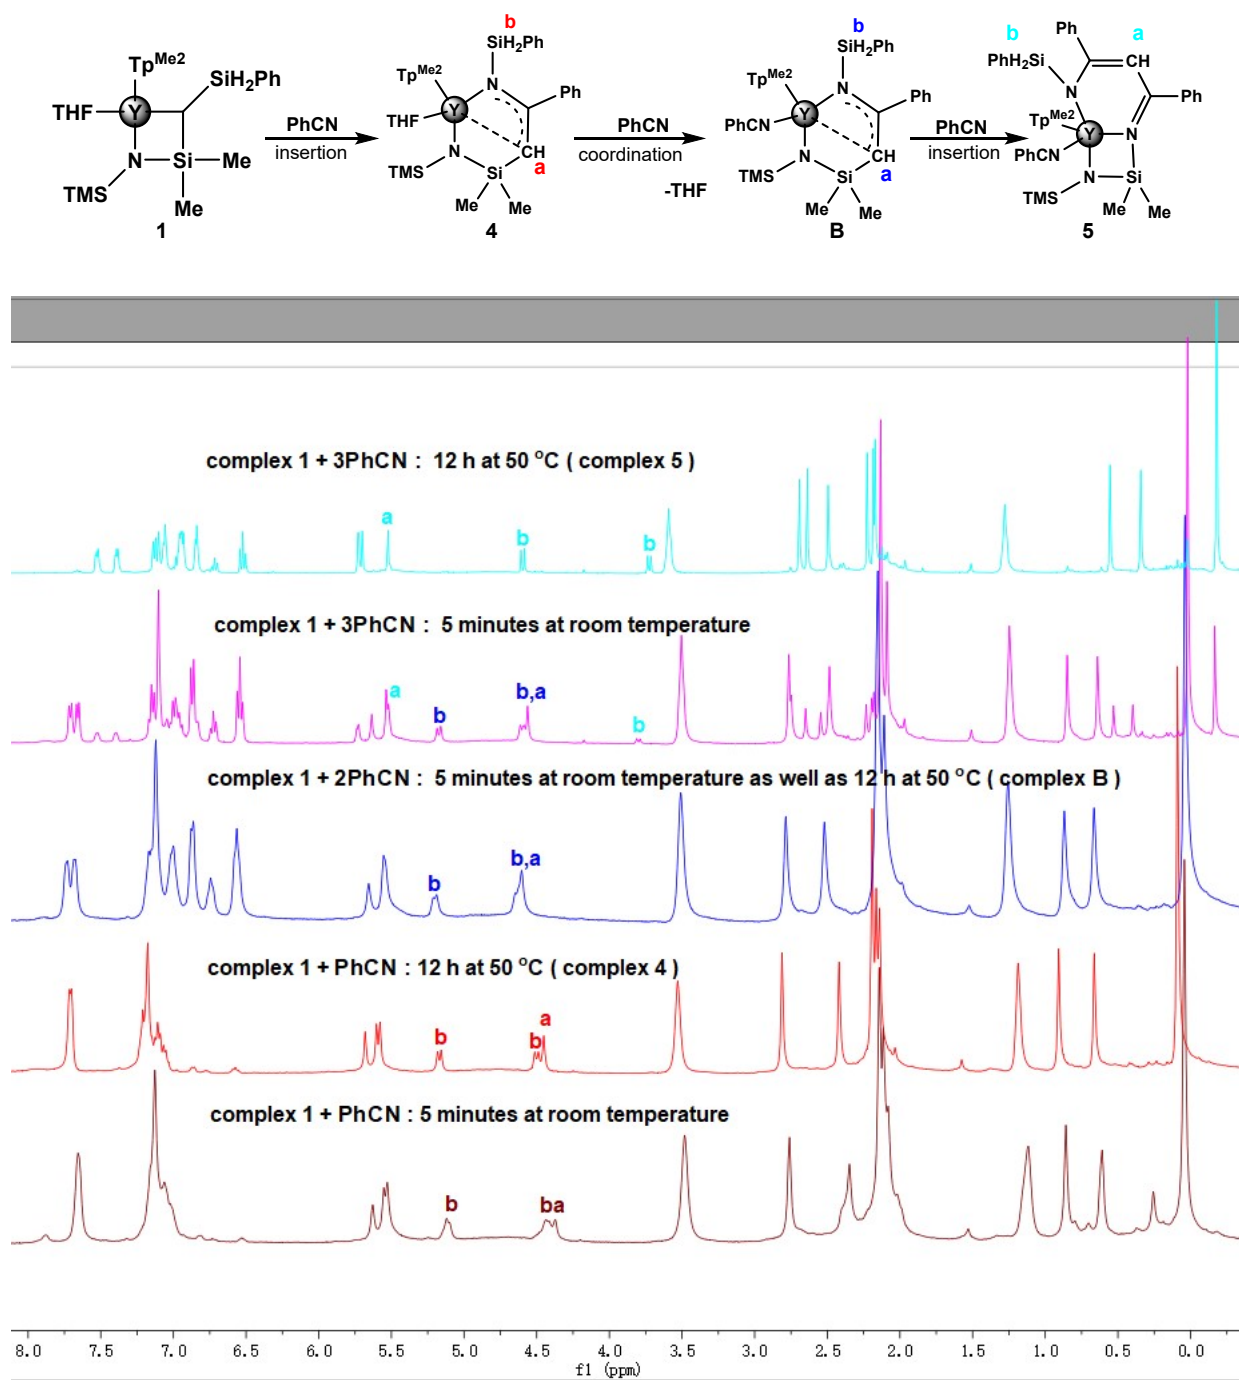

**Figure S22.** The in situ <sup>1</sup>H NMR spectra of stepwise reactions of **1** and PhCN with different molar ratio in C<sub>6</sub>D<sub>6</sub>. ( the in situ NMR experiments were done at room temperature or 50 °C (see the title of each spectrum), but their NMR spectra were recorded at room temperature)



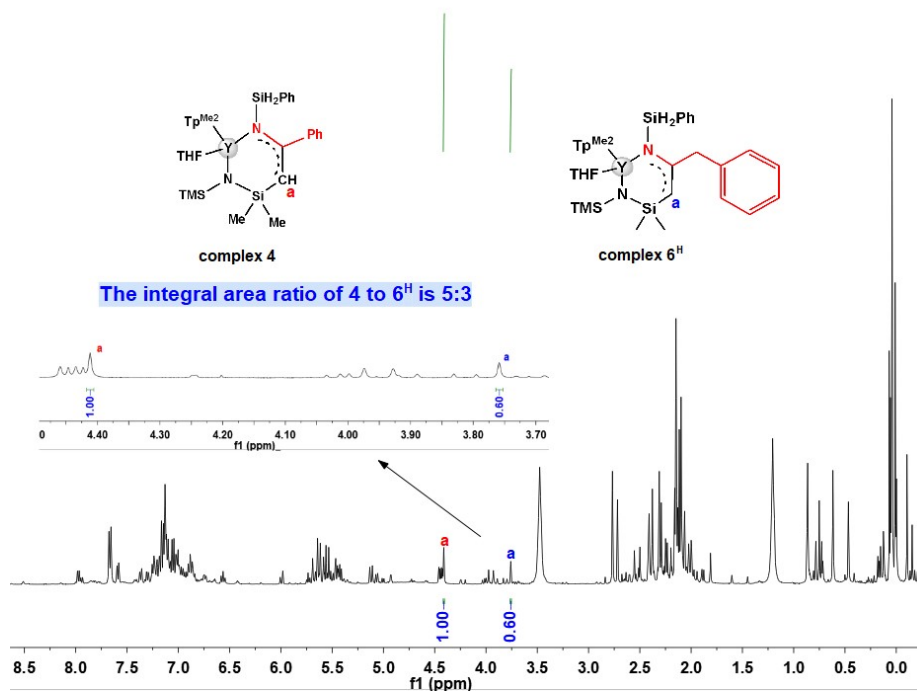

**Figure S23.** The in situ  $^1\text{H}$  NMR spectra of competitive reactions of **1** with equimolar **PhCN** and **BnCN** in  $\text{C}_6\text{D}_6$ .

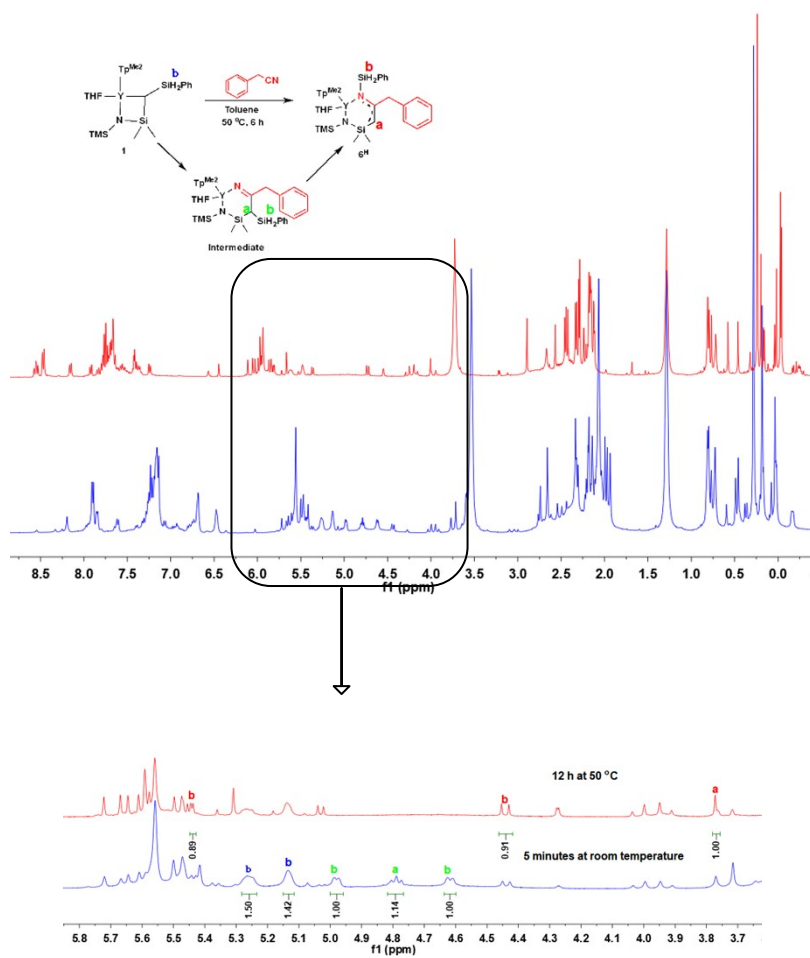

**Figure S24.** The in situ  $^1\text{H}$  NMR spectra of reactions of **1** with equimolar  $\text{C}_6\text{H}_4\text{CH}_2\text{CN}$  in  $\text{C}_6\text{D}_6$ .

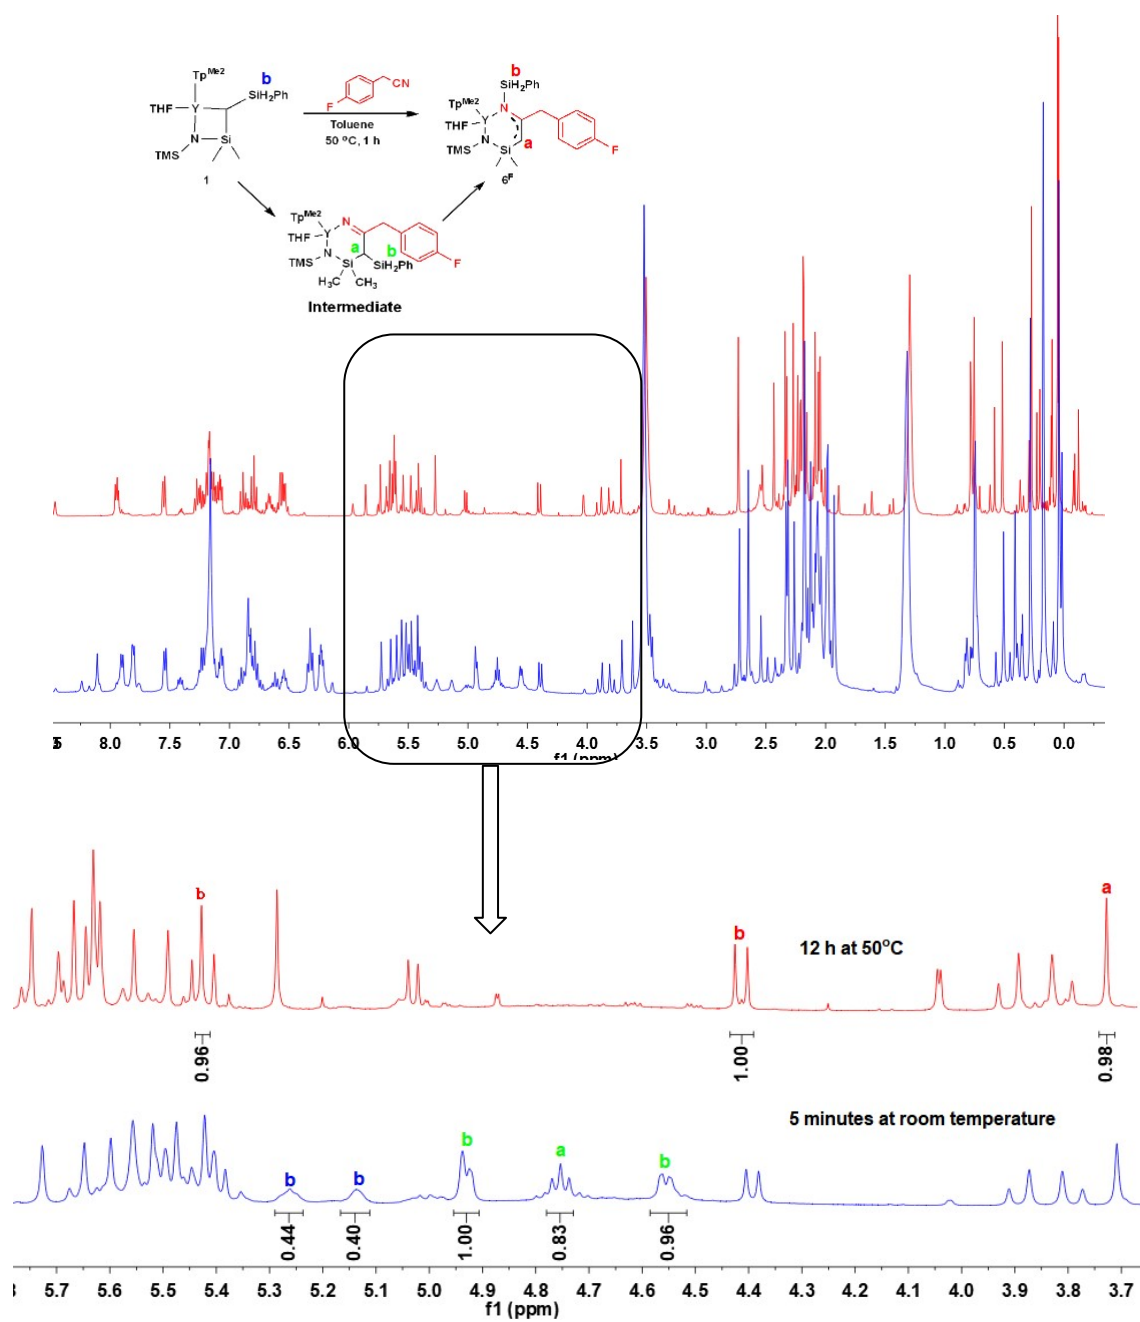

Figure S25. The in situ <sup>1</sup>H NMR spectra of reactions of **1** with equimolar *p*-MeO-C<sub>6</sub>H<sub>4</sub>CH<sub>2</sub>CN in C<sub>6</sub>D<sub>6</sub>.

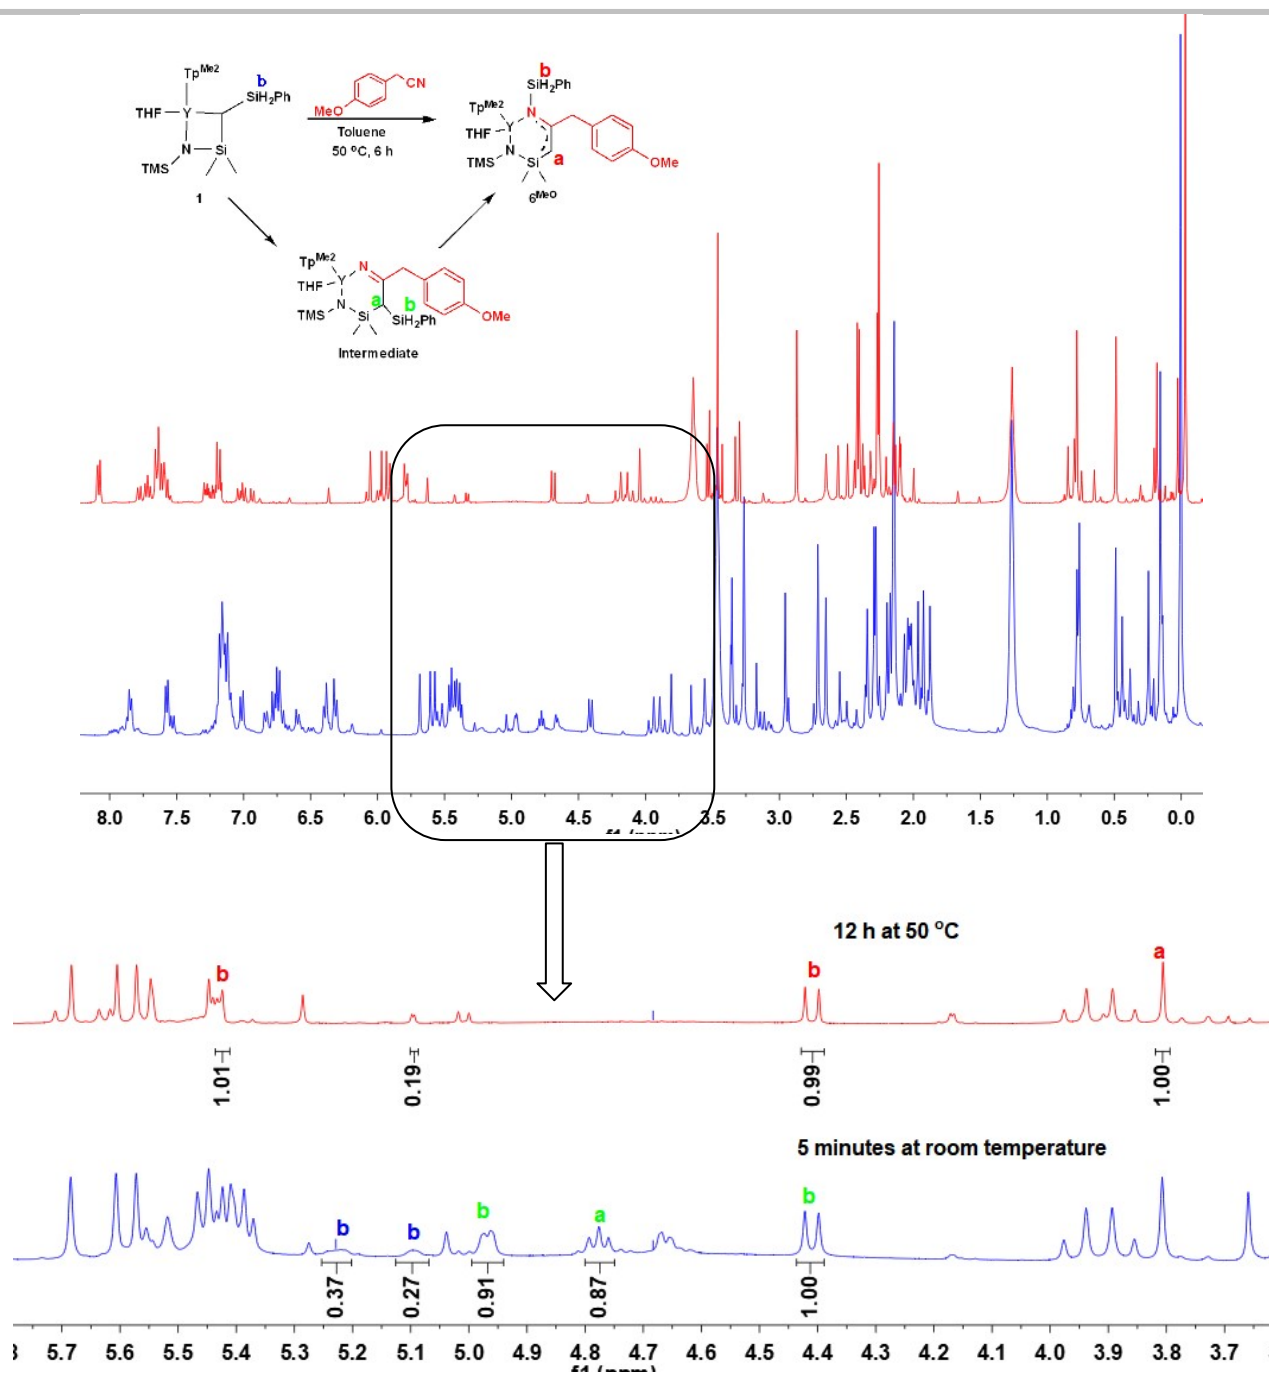

Figure S26. The in situ <sup>1</sup>H NMR spectra of reactions of **1** with equimolar *p*-F-C<sub>6</sub>H<sub>4</sub>CH<sub>2</sub>CN in C<sub>6</sub>D<sub>6</sub>.
